# Supplementary material
Source: publisher site journal article supplement (https://www.dovepress.com/article/302757)
Supplement: Supplementary file 1 [file get_supplementary_file.php]

**Supplementary Table: List of Data Extraction Codes**

|  | **ICD 10** | **ICD 9** |
| --- | --- | --- |
| **Retinal Detachment** | H33.00, H33.01, H33.02, H33.001, H33.002, H33.009, H33.011, H33.012, H33.019, H33.021, H33.022, H33.029, H33.4, H33.8, H33.2, H33.0 | 361.00, 361.01, 361.02, 361.03, 361.05, 361.07, 361.2, 361.9, 361.81, 361.89. |
| **Endophthalmitis** | H44.0, H44.009, H44.001, H44.002, H44.12, H44.1, H44.19 | 360.0, 360.1, 360.19, 360.01, 360.02, 360.03, 360.13 |

**Abbreviations:** ICD, International Classification of Diseases.
